# Supplementary material for: Urban PM 2.5 pollution in Kazakhstan: health burden and economic costs
Source: Royal Society of Chemistry journal article supplement (doi:10.1039/d5va00194c), 2025-12-02
Supplement: d5va00194c1.pdf [file d5va00194c1.pdf]

## Supplementary materials

### Urban PM<sub>2.5</sub> Pollution in Kazakhstan: Health Burden and Economic Costs

*Aset Muratuly<sup>a,b,c</sup>, Ravkat Mukhtarov<sup>a,b</sup>, Ivan Radelyuk<sup>a,b,c</sup>, Ferhat Karaca<sup>d,e</sup>, Nassiba Baimatova<sup>a,b,c\*</sup>*

<sup>a</sup>Faculty of Chemistry and Chemical Technology, Center of Physical Chemical Methods of Research and Analysis,  
Al-Farabi Kazakh National University, Almaty, Kazakhstan

<sup>b</sup>Environmental and Analytical Chemistry Laboratory, Almaty, Kazakhstan

<sup>c</sup>Department of Chemistry and Chemical Technology, Toraighyrov University, Pavlodar, Kazakhstan

<sup>d</sup>School of Engineering and Digital Science, Department of Civil and Environmental Engineering, Nazarbayev  
University, Astana, Kazakhstan

<sup>e</sup>The Environment and Resource Efficiency Cluster, Nazarbayev University, Astana, Kazakhstan

\*Corresponding author: Nassiba Baimatova. E-mail address: [baimatova@cfhma.kz](mailto:baimatova@cfhma.kz)

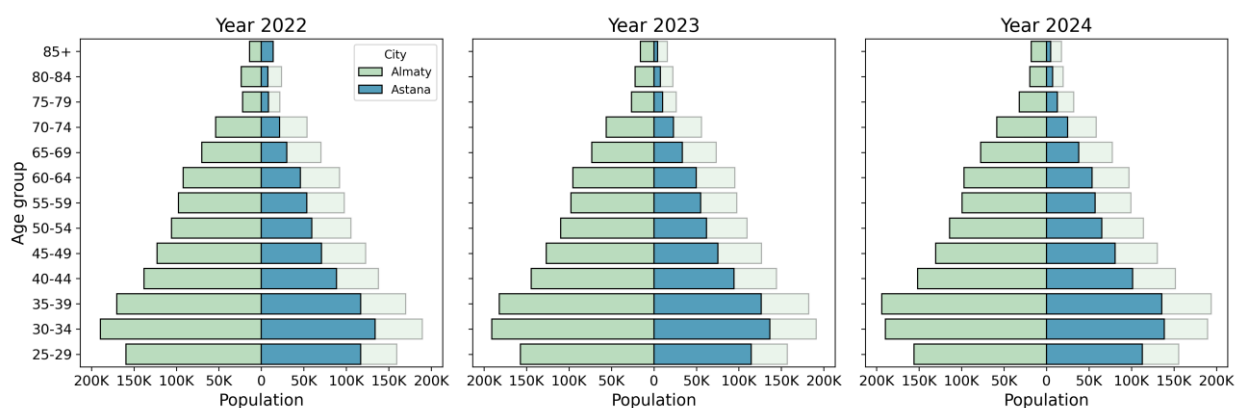

**Fig. S1.** Statistics of the population for Almaty and Astana for 2022-2024 by age groups.

**Table S1**

The detailed population distribution and mortality rates stratified by 5-year age groups for Almaty and Astana.

| City   | Age group | 2022       |           | 2023       |           | 2024       |           |
|--------|-----------|------------|-----------|------------|-----------|------------|-----------|
|        |           | population | mortality | population | mortality | population | mortality |
| Almaty | 25-29     | 159478     | 81        | 157187     | 74        | 155791     | 66        |
|        | 30-34     | 189482     | 177       | 190899     | 189       | 189598     | 146       |
|        | 35-39     | 169977     | 249       | 182115     | 265       | 193839     | 253       |
|        | 40-44     | 137981     | 397       | 144402     | 361       | 151810     | 361       |
|        | 45-49     | 122851     | 458       | 126636     | 460       | 130508     | 492       |
|        | 50-54     | 105615     | 575       | 109791     | 619       | 114159     | 613       |
|        | 55-59     | 97546      | 820       | 97640      | 771       | 99433      | 730       |
|        | 60-64     | 92014      | 1174      | 95240      | 1165      | 97045      | 1170      |
|        | 65-69     | 70132      | 1404      | 73221      | 1404      | 77568      | 1393      |
|        | 70-74     | 53874      | 1575      | 56118      | 1546      | 58458      | 1612      |
|        | 75-79     | 21886      | 984       | 26289      | 1139      | 32016      | 1407      |
|        | 80-84     | 23738      | 1806      | 22189      | 1448      | 19698      | 1222      |
|        | 85+       | 13904      | 2051      | 15865      | 2009      | 17846      | 2242      |
| Astana | 25-29     | 116898     | 56        | 114536     | 66        | 112771     | 83        |
|        | 30-34     | 133776     | 111       | 136610     | 101       | 138803     | 94        |
|        | 35-39     | 116866     | 171       | 126251     | 142       | 135818     | 163       |
|        | 40-44     | 88558      | 209       | 94408      | 228       | 101385     | 227       |
|        | 45-49     | 70936      | 247       | 75252      | 291       | 80791      | 263       |
|        | 50-54     | 59288      | 339       | 61992      | 340       | 65212      | 346       |
|        | 55-59     | 53541      | 451       | 55102      | 406       | 57340      | 440       |
|        | 60-64     | 45837      | 571       | 49724      | 616       | 53557      | 673       |
|        | 65-69     | 30077      | 616       | 33615      | 631       | 37970      | 708       |
|        | 70-74     | 21321      | 593       | 23021      | 647       | 24741      | 691       |
|        | 75-79     | 8238       | 360       | 10121      | 449       | 12749      | 619       |
|        | 80-84     | 7645       | 627       | 7606       | 513       | 7095       | 495       |
|        | 85+       | 13904      | 587       | 4268       | 593       | 5056       | 644       |

**Table S2**

GEMM model parameters utilized for estimating mortality in the Chinese male cohort. (Burnett et al., 2018).

| Cause of Death | Age Range | $\theta$ | St. Err $\theta$ | $\alpha$ | $\mu$ | $\nu$ |
|----------------|-----------|----------|------------------|----------|-------|-------|
| NCD+LRI        | >25       | 0.143    | 0.01807          | 1.6      | 15.5  | 36.8  |
|                | 27.5      | 0.1585   | 0.01477          | 1.6      | 15.5  | 36.8  |
|                | 32.5      | 0.1577   | 0.0147           | 1.6      | 15.5  | 36.8  |
|                | 37.5      | 0.157    | 0.01463          | 1.6      | 15.5  | 36.8  |
|                | 42.5      | 0.1558   | 0.0145           | 1.6      | 15.5  | 36.8  |
|                | 47.5      | 0.1532   | 0.01425          | 1.6      | 15.5  | 36.8  |
|                | 52.5      | 0.1499   | 0.01394          | 1.6      | 15.5  | 36.8  |
|                | 57.5      | 0.1462   | 0.01361          | 1.6      | 15.5  | 36.8  |
|                | 62.5      | 0.1421   | 0.01325          | 1.6      | 15.5  | 36.8  |
|                | 67.5      | 0.1374   | 0.01284          | 1.6      | 15.5  | 36.8  |
|                | 72.5      | 0.1319   | 0.01234          | 1.6      | 15.5  | 36.8  |
|                | 77.5      | 0.1253   | 0.01174          | 1.6      | 15.5  | 36.8  |
|                | 85        | 0.1141   | 0.01071          | 1.6      | 15.5  | 36.8  |
| IHD            | >25       | 0.2969   | 0.01787          | 1.9      | 12    | 40.2  |
|                | 27.5      | 0.507    | 0.02458          | 1.9      | 12    | 40.2  |
|                | 32.5      | 0.4762   | 0.02309          | 1.9      | 12    | 40.2  |
|                | 37.5      | 0.4455   | 0.0216           | 1.9      | 12    | 40.2  |
|                | 42.5      | 0.4148   | 0.02011          | 1.9      | 12    | 40.2  |
|                | 47.5      | 0.3841   | 0.01862          | 1.9      | 12    | 40.2  |
|                | 52.5      | 0.3533   | 0.01713          | 1.9      | 12    | 40.2  |
|                | 57.5      | 0.3226   | 0.01564          | 1.9      | 12    | 40.2  |
|                | 62.5      | 0.2919   | 0.01415          | 1.9      | 12    | 40.2  |
|                | 67.5      | 0.2612   | 0.01266          | 1.9      | 12    | 40.2  |
|                | 72.5      | 0.2304   | 0.01117          | 1.9      | 12    | 40.2  |
|                | 77.5      | 0.1997   | 0.00968          | 1.9      | 12    | 40.2  |
|                | 85        | 0.1536   | 0.00745          | 1.9      | 12    | 40.2  |
| Stroke         | >25       | 0.272    | 0.07697          | 6.2      | 16.7  | 23.7  |
|                | 27.5      | 0.4513   | 0.11919          | 6.2      | 16.7  | 23.7  |
|                | 32.5      | 0.424    | 0.11197          | 6.2      | 16.7  | 23.7  |
|                | 37.5      | 0.3966   | 0.10475          | 6.2      | 16.7  | 23.7  |
|                | 42.5      | 0.3693   | 0.09752          | 6.2      | 16.7  | 23.7  |
|                | 47.5      | 0.3419   | 0.0903           | 6.2      | 16.7  | 23.7  |
|                | 52.5      | 0.3146   | 0.08307          | 6.2      | 16.7  | 23.7  |
|                | 57.5      | 0.2872   | 0.07585          | 6.2      | 16.7  | 23.7  |
|                | 62.5      | 0.2598   | 0.06863          | 6.2      | 16.7  | 23.7  |
|                | 67.5      | 0.2325   | 0.0619           | 6.2      | 16.7  | 23.7  |
|                | 72.5      | 0.2051   | 0.05418          | 6.2      | 16.7  | 23.7  |
|                | 77.5      | 0.1778   | 0.04695          | 6.2      | 16.7  | 23.7  |
|                | 85        | 0.1368   | 0.03611          | 6.2      | 16.7  | 23.7  |
| COPD           | >25       | 0.251    | 0.06762          | 6.5      | 2.5   | 32    |
| LC             | >25       | 0.2942   | 0.06147          | 6.2      | 9.3   | 29.8  |
| LRI            | >25       | 0.4468   | 0.11735          | 6.4      | 5.7   | 8.4   |

**Table S3**

Number of potential avoidable deaths from various counterfactual scenarios of reaching interim WHO PM<sub>2.5</sub> targets by 2022.

| Year | City   | Model cohort | Model       | Data Source | Target PM <sub>2.5</sub> concentration (µg m <sup>-3</sup> ) |      |      |      |
|------|--------|--------------|-------------|-------------|--------------------------------------------------------------|------|------|------|
|      |        |              |             |             | 25                                                           | 15   | 10   | 5    |
| 2022 | Almaty | w_cmc        | Five causes | AirKaz      | 442                                                          | 910  | 1206 | 1610 |
|      |        |              |             | AirNow      | 417                                                          | 884  | 1181 | 1585 |
|      |        |              | NCD+LRI     | AirKaz      | 508                                                          | 1013 | 1335 | 1814 |
|      |        |              |             | AirNow      | 478                                                          | 983  | 1304 | 1784 |
|      |        | wo_cmc       | Five causes | AirKaz      | 397                                                          | 853  | 1142 | 1507 |
|      |        |              |             | AirNow      | 375                                                          | 832  | 1121 | 1486 |
|      |        |              | NCD+LRI     | AirKaz      | 537                                                          | 1073 | 1401 | 1862 |
|      |        |              |             | AirNow      | 506                                                          | 1042 | 1369 | 1830 |
|      | Astana | w_cmc        | Five causes | AirKaz      | _*                                                           | 169  | 300  | 479  |
|      |        |              |             | AirNow      |                                                              | 149  | 280  | 459  |
|      |        |              | NCD+LRI     | AirKaz      |                                                              | 177  | 316  | 522  |
|      |        |              |             | AirNow      |                                                              | 156  | 294  | 501  |
|      |        | wo_cmc       | Five causes | AirKaz      |                                                              | 166  | 293  | 456  |
|      |        |              |             | AirNow      |                                                              | 146  | 274  | 436  |
|      |        |              | NCD+LRI     | AirKaz      |                                                              | 188  | 329  | 527  |
|      |        |              |             | AirNow      |                                                              | 165  | 306  | 504  |
| 2023 | Almaty | w_cmc        | Five causes | AirNow      | 144                                                          | 603  | 894  | 1290 |
|      |        |              | NCD+LRI     |             | 161                                                          | 655  | 969  | 1439 |
|      |        | wo_cmc       | Five causes |             | 135                                                          | 583  | 866  | 1224 |
|      |        |              | NCD+LRI     |             | 172                                                          | 696  | 1016 | 1467 |
|      | Astana | w_cmc        | Five causes |             |                                                              | 67   | 201  | 384  |
|      |        |              | NCD+LRI     |             |                                                              | 70   | 211  | 422  |
|      |        | wo_cmc       | Five causes |             |                                                              | 66   | 197  | 362  |
|      |        |              | NCD+LRI     |             |                                                              | 74   | 217  | 419  |
|      | Almaty | w_cmc        | Five causes |             | _*                                                           | 440  | 735  | 1138 |
|      |        |              | NCD+LRI     |             |                                                              | 474  | 795  | 1274 |
|      |        | wo_cmc       | Five causes |             |                                                              | 430  | 718  | 1082 |
|      |        |              | NCD+LRI     |             |                                                              | 503  | 829  | 1289 |
| 2024 | Astana | w_cmc        | Five causes |             |                                                              | 89   | 233  | 431  |
|      |        |              | NCD+LRI     |             |                                                              | 93   | 246  | 474  |
|      |        | wo_cmc       | Five causes |             |                                                              | 88   | 228  | 407  |
|      |        |              | NCD+LRI     |             |                                                              | 98   | 253  | 472  |
|      |        | w_cmc        | Five causes |             |                                                              | 89   | 233  | 431  |
|      |        |              | NCD+LRI     |             |                                                              | 93   | 246  | 474  |

\*Note: Average concentration in the year is higher than the target concentration

**Table S4**

Potential economic benefits from various counterfactual scenarios of reaching interim WHO PM<sub>2.5</sub> targets by 2022 in constant 2022 million USD.

| Year | City   | Model cohort | Model       | Data Source | Target PM <sub>2.5</sub> concentration (µg m <sup>-3</sup> ) |       |       |       |
|------|--------|--------------|-------------|-------------|--------------------------------------------------------------|-------|-------|-------|
|      |        |              |             |             | 25                                                           | 15    | 10    | 5     |
| 2022 | Almaty | w_cmc        | Five causes | AirKaz      | 875                                                          | 1,801 | 2,388 | 3,187 |
|      |        |              |             | AirNow      | 825                                                          | 1,751 | 2,338 | 3,137 |
|      |        |              | NCD+LRI     | AirKaz      | 1,006                                                        | 2,005 | 2,642 | 3,592 |
|      |        |              |             | AirNow      | 946                                                          | 1,945 | 2,582 | 3,532 |
|      |        | wo_cmc       | Five causes | AirKaz      | 785                                                          | 1,689 | 2,261 | 2,983 |
|      |        |              |             | AirNow      | 743                                                          | 1,647 | 2,219 | 2,941 |
|      |        |              | NCD+LRI     | AirKaz      | 1,064                                                        | 2,124 | 2,773 | 3,685 |
|      |        |              |             | AirNow      | 1,002                                                        | 2,062 | 2,711 | 3,623 |
|      | Astana | w_cmc        | Five causes | AirKaz      | _*                                                           | 334   | 593   | 949   |
|      |        |              |             | AirNow      |                                                              | 294   | 553   | 908   |
|      |        |              | NCD+LRI     | AirKaz      |                                                              | 351   | 625   | 1,034 |
|      |        |              |             | AirNow      |                                                              | 308   | 582   | 991   |
|      |        | wo_cmc       | Five causes | AirKaz      |                                                              | 328   | 581   | 902   |
|      |        |              |             | AirNow      |                                                              | 289   | 542   | 863   |
|      |        |              | NCD+LRI     | AirKaz      |                                                              | 372   | 651   | 1,043 |
|      |        |              |             | AirNow      |                                                              | 326   | 605   | 998   |
| 2023 | Almaty | w_cmc        | Five causes | AirNow      | 283                                                          | 1,180 | 1,749 | 2,524 |
|      |        |              | NCD+LRI     |             | 315                                                          | 1,281 | 1,896 | 2,814 |
|      |        | wo_cmc       | Five causes |             | 264                                                          | 1,140 | 1,695 | 2,395 |
|      |        |              | NCD+LRI     |             | 337                                                          | 1,362 | 1,989 | 2,870 |
|      | Astana | w_cmc        | Five causes |             | _*                                                           | 132   | 393   | 751   |
|      |        |              | NCD+LRI     |             |                                                              | 137   | 413   | 825   |
|      |        | wo_cmc       | Five causes |             |                                                              | 130   | 385   | 709   |
|      |        |              | NCD+LRI     |             |                                                              | 144   | 425   | 821   |
|      | Almaty | w_cmc        | Five causes |             |                                                              | 921   | 1,540 | 2,383 |
|      |        |              | NCD+LRI     |             |                                                              | 992   | 1,664 | 2,666 |
|      |        | wo_cmc       | Five causes |             |                                                              | 900   | 1,503 | 2,264 |
|      |        |              | NCD+LRI     |             |                                                              | 1,052 | 1,736 | 2,699 |
| 2024 | Astana | w_cmc        | Five causes |             |                                                              | 187   | 488   | 902   |
|      |        |              | NCD+LRI     |             |                                                              | 195   | 514   | 991   |
|      |        | wo_cmc       | Five causes |             |                                                              | 184   | 478   | 852   |
|      |        |              | NCD+LRI     |             |                                                              | 205   | 530   | 988   |
|      |        | w_cmc        | Five causes |             |                                                              | 187   | 488   | 902   |
|      |        |              | NCD+LRI     |             |                                                              | 195   | 514   | 991   |

\*Note: Average concentration in the year is higher than the target concentration

## **Text S1 Data processing and quality control measures**

PM<sub>2.5</sub> levels were measured in real-time by each instrument; however, hourly data was included in the datasets. Hourly PM<sub>2.5</sub> data were quality-checked prior to analysis, with observations of PM<sub>2.5</sub> concentrations  $\leq 0 \mu\text{g m}^{-3}$  removed. Although outlier filtering using 0.1st and 99th percentiles was tested, it was not applied. Filtering out these percentiles decreased the annual mean in Almaty from  $37.1 \mu\text{g m}^{-3}$  to  $35.0 \mu\text{g m}^{-3}$ , a reduction of approximately 5.6%.

However, since such concentrations were observed during peaks of high pollution episodes rather than isolated incidents, the decision was made to keep these values in the final analysis, as they represented actual exposure conditions rather than measurement errors. However, data from extremely high outliers ( $>800 \mu\text{g m}^{-3}$ ) were still excluded, as they indicated sensor malfunctions, data transmission errors, or exceptional pollution events rather than typical ambient conditions.

For each city, data from individual sensors were evaluated for completeness, and only those with at least 80% hourly data availability during the study period were retained to ensure temporal representativeness. Then, data from individual sensors in the Airkaz network were combined sensor by sensor and used in the GEMM model.

Hourly data were converted into daily averages for modeling, while mortality data were available on an annual basis. Therefore, annual mean PM<sub>2.5</sub> concentrations calculated from the daily data were used to align the temporal resolution between the exposure and outcome datasets.

To estimate the annual population exposure for the GEMM model, hourly PM<sub>2.5</sub> data were aggregated over the study year. A comparison between the hourly-based and daily-averaged concentration datasets for 2022 revealed a negligible difference in the resulting annual means ( $37.1 \mu\text{g m}^{-3}$  vs.  $36.8 \mu\text{g m}^{-3}$ , respectively). This indicates that hourly averaging has an insignificant impact on the long-term exposure estimates, since both approaches tend to the same annual averages when sufficient data coverage is available.

Using hourly data captures more detailed temporal variability and prevents potential information loss due to early aggregation. It also ensures that the annual exposure levels remain consistent with the GEMM framework. Therefore, hourly data were employed in the final mortality estimation to preserve data accuracy and maintain adherence to the original measurement resolution.

## **Text S2**

The VSL estimates for a sample of OECD countries were 3.83 million (2011 USD, PPP-adjusted), corresponding to a GDP per capita of 37 thousand (2011 USD, PPP-adjusted).

Kazakhstan's GDP per capita in local currency (KZT) was 5,284.7 thousand, 6,002.0 thousand, and 6,659.8 thousand KZT in 2022, 2023, and 2024, respectively. The consumer price index (CPI, 2010 = 100) increased from 108.5 in 2011 to 251.1, 288.0, and 313.5 in 2022-2024, respectively. The PPP conversion factor for KZT in 2011 was 82.09 KZT per international dollar.

The U.S. consumer price index (CPI, 2010 = 100) rose from 103.2 in 2011 to 134.2 in 2022.
